# Supplementary material for: Evaluation of the association of UBASH3A and SYNGR1 with rheumatoid arthritis and disease activity and severity in Han Chinese
Source: PubMed Central journal article supplement (PMC5732735; doi:10.18632/oncotarget.21875), 2017-10-17
Supplement: oncotarget-08-103385-s001.pdf [file oncotarget-08-103385-s001.pdf]

## Evaluation of the association of *UBASH3A* and *SYNGR1* with rheumatoid arthritis and disease activity and severity in Han Chinese

### SUPPLEMENTARY MATERIALS

**Supplementary Table 1: Information of the 30 selected SNPs tested in the discovery stage**

| Chr | Position | SNP        | Allele | Function                      | Gene           | MAF    | HWE    |
|-----|----------|------------|--------|-------------------------------|----------------|--------|--------|
| 21  | 42416077 | rs11203203 | A/G    | intron,untranslated-5         | <i>UBASH3A</i> | 0.0881 | 0.8447 |
| 21  | 42415746 | rs11700858 | A/C    | intron,untranslated-5         | <i>UBASH3A</i> | 0.0858 | 0.6855 |
| 21  | 42431928 | rs12482947 | C/T    | intron                        | <i>UBASH3A</i> | 0.4494 | 0.9484 |
| 21  | 42418534 | rs13048049 | A/G/T  | ncRNA,missense                | <i>UBASH3A</i> | 0.0766 | 0.5021 |
| 21  | 42432123 | rs13052676 | C/T    | coding-synon,ncRNA            | <i>UBASH3A</i> | 0.2628 | 0.8683 |
| 21  | 42434957 | rs1893592  | A/C    | intron,ncRNA                  | <i>UBASH3A</i> | 0.2759 | 0.7593 |
| 21  | 42438382 | rs1893593  | A/G    | intron,untranslated-3         | <i>UBASH3A</i> | 0.3107 | 1      |
| 21  | 42442356 | rs2254368  | A/G    | intron                        | <i>UBASH3A</i> | 0.4356 | 1      |
| 21  | 42404027 | rs2277800  | C/T    | ncRNA,missense,untranslated-5 | <i>UBASH3A</i> | 0.1287 | 1      |
| 21  | 42426620 | rs2839509  | A/G    | intron                        | <i>UBASH3A</i> | 0.1552 | 1      |
| 21  | 42447734 | rs2839519  | A/G    | near-gene-3                   | <i>UBASH3A</i> | 0.1406 | 1      |
| 21  | 42406235 | rs3746923  | C/T    | intron                        | <i>UBASH3A</i> | 0.4073 | 0.9473 |
| 21  | 42406509 | rs3746925  | C/T    | intron                        | <i>UBASH3A</i> | 0.2375 | 1      |
| 21  | 42446949 | rs3827232  | C/T    | intron                        | <i>UBASH3A</i> | 0.1966 | 0.9196 |
| 21  | 42435358 | rs4101     | C/T    | intron,ncRNA                  | <i>UBASH3A</i> | 0.2268 | 0.9267 |
| 21  | 42405366 | rs7282058  | C/T    | intron                        | <i>UBASH3A</i> | 0.3107 | 0.9405 |
| 21  | 42446395 | rs884339   | A/G    | intron                        | <i>UBASH3A</i> | 0.3498 | 0.9436 |
| 21  | 42416281 | rs9976767  | A/G    | intron,untranslated-5         | <i>UBASH3A</i> | 0.2770 | 0.9358 |
| 22  | 39350419 | rs12166817 | A/C    | intron                        | <i>SYNGR1</i>  | 0.1046 | 1      |
| 22  | 39342420 | rs137682   | A/C    | unknown                       | <i>SYNGR1</i>  | 0.1134 | 1      |
| 22  | 39342720 | rs137684   | C/T    | unknown                       | <i>SYNGR1</i>  | 0.1061 | 0.8657 |
| 22  | 39343623 | rs137685   | C/T    | unknown                       | <i>SYNGR1</i>  | 0.0969 | 0.8555 |
| 22  | 39373813 | rs1569499  | C/T    | intron                        | <i>SYNGR1</i>  | 0.0682 | 0.4557 |
| 22  | 39365250 | rs2012907  | A/G    | intron                        | <i>SYNGR1</i>  | 0.0881 | 0.4191 |
| 22  | 39360849 | rs2049986  | C/G    | intron                        | <i>SYNGR1</i>  | 0.2057 | 1      |
| 22  | 39351775 | rs2069235  | A/G    | intron                        | <i>SYNGR1</i>  | 0.2816 | 0.9372 |
| 22  | 39371006 | rs5750806  | A/G    | intron                        | <i>SYNGR1</i>  | 0.0732 | 0.3503 |
| 22  | 39393081 | rs5995729  | A/C    | unknown                       | <i>SYNGR1</i>  | 0.0759 | 1      |
| 22  | 39364878 | rs739363   | G/T    | intron                        | <i>SYNGR1</i>  | 0.0851 | 0.5302 |
| 22  | 39351666 | rs909685   | A/T    | intron                        | <i>SYNGR1</i>  | 0.2398 | 0.5028 |

Chr, Chromosome; MAF, minor allele frequency; HWE, Hardy-Weinberg equilibrium.

**Supplementary Table 2: Summarized results of the comprehensive statistical power analyses for the two-stage study design**

|                      | MAF | 0.05        | 0.1          | 0.15         | 0.2          | 0.25         | 0.3          | 0.35         | 0.4          | 0.45         |
|----------------------|-----|-------------|--------------|--------------|--------------|--------------|--------------|--------------|--------------|--------------|
| <b>Relative Risk</b> |     |             |              |              |              |              |              |              |              |              |
| 0.7                  |     | <b>0.84</b> | <b>0.982</b> | <b>0.998</b> | <b>1</b>     | <b>1</b>     | <b>1</b>     | <b>1</b>     | <b>1</b>     | <b>1</b>     |
| 0.8                  |     | 0.443       | 0.703        | <b>0.841</b> | <b>0.91</b>  | <b>0.946</b> | <b>0.964</b> | <b>0.974</b> | <b>0.979</b> | <b>0.981</b> |
| 0.9                  |     | 0.135       | 0.213        | 0.281        | 0.339        | 0.385        | 0.422        | 0.449        | 0.468        | 0.478        |
| 1.1                  |     | 0.007       | 0.014        | 0.022        | 0.029        | 0.036        | 0.041        | 0.046        | 0.048        | 0.050        |
| 1.2                  |     | 0.035       | 0.087        | 0.144        | 0.195        | 0.236        | 0.268        | 0.290        | 0.302        | 0.306        |
| 1.3                  |     | 0.106       | 0.259        | 0.388        | 0.482        | 0.546        | 0.587        | 0.612        | 0.623        | 0.623        |
| 1.4                  |     | 0.226       | 0.477        | 0.632        | 0.722        | 0.774        | <b>0.805</b> | <b>0.821</b> | <b>0.826</b> | <b>0.823</b> |
| 1.5                  |     | 0.375       | 0.666        | <b>0.801</b> | <b>0.867</b> | <b>0.901</b> | <b>0.918</b> | <b>0.926</b> | <b>0.928</b> | <b>0.925</b> |

MAF, minor allele frequency.

**Supplementary Table 3: Full results of the single marker based analyses in discovery stage using additive model**

| Chr | SNP        | Position | A1 | OR   | L95  | U95  | STAT  | P-value  |
|-----|------------|----------|----|------|------|------|-------|----------|
| 21  | rs2277800  | 42404027 | T  | 1.13 | 0.87 | 1.46 | 0.91  | 0.3609   |
| 21  | rs7282058  | 42405366 | T  | 0.98 | 0.81 | 1.19 | -0.17 | 0.8632   |
| 21  | rs3746923  | 42406235 | T  | 0.94 | 0.78 | 1.12 | -0.69 | 0.4883   |
| 21  | rs3746925  | 42406509 | T  | 1.04 | 0.85 | 1.28 | 0.38  | 0.7027   |
| 21  | rs11700858 | 42415746 | C  | 0.98 | 0.71 | 1.34 | -0.14 | 0.8887   |
| 21  | rs11203203 | 42416077 | A  | 0.94 | 0.69 | 1.29 | -0.36 | 0.7207   |
| 21  | rs9976767  | 42416281 | G  | 1.08 | 0.89 | 1.31 | 0.78  | 0.4369   |
| 21  | rs13048049 | 42418534 | A  | 0.98 | 0.71 | 1.37 | -0.11 | 0.9159   |
| 21  | rs2839509  | 42426620 | G  | 1.05 | 0.82 | 1.34 | 0.40  | 0.6923   |
| 21  | rs12482947 | 42431928 | T  | 0.96 | 0.80 | 1.14 | -0.50 | 0.6152   |
| 21  | rs13052676 | 42432123 | T  | 1.04 | 0.85 | 1.27 | 0.39  | 0.6972   |
| 21  | rs1893592  | 42434957 | C  | 0.64 | 0.52 | 0.79 | -4.15 | 3.26E-05 |
| 21  | rs4101     | 42435358 | C  | 1.06 | 0.86 | 1.31 | 0.53  | 0.5963   |
| 21  | rs1893593  | 42438382 | A  | 0.97 | 0.80 | 1.17 | -0.35 | 0.7246   |
| 21  | rs2254368  | 42442356 | G  | 1.03 | 0.86 | 1.23 | 0.35  | 0.7288   |
| 21  | rs884339   | 42446395 | A  | 1.05 | 0.87 | 1.26 | 0.53  | 0.5960   |
| 21  | rs3827232  | 42446949 | T  | 0.96 | 0.77 | 1.21 | -0.32 | 0.7497   |
| 21  | rs2839519  | 42447734 | A  | 1.15 | 0.89 | 1.47 | 1.06  | 0.2883   |
| 22  | rs137682   | 39342420 | A  | 0.92 | 0.69 | 1.22 | -0.58 | 0.5591   |
| 22  | rs137684   | 39342720 | C  | 1.04 | 0.78 | 1.38 | 0.26  | 0.7962   |
| 22  | rs137685   | 39343623 | T  | 0.95 | 0.70 | 1.29 | -0.33 | 0.7443   |
| 22  | rs12166817 | 39350419 | A  | 1.06 | 0.80 | 1.41 | 0.41  | 0.6799   |
| 22  | rs909685   | 39351666 | T  | 0.68 | 0.55 | 0.85 | -3.42 | 6.23E-04 |
| 22  | rs2069235  | 39351775 | G  | 0.96 | 0.78 | 1.16 | -0.45 | 0.6493   |
| 22  | rs2049986  | 39360849 | G  | 1.06 | 0.85 | 1.32 | 0.52  | 0.6023   |
| 22  | rs739363   | 39364878 | C  | 1.10 | 0.81 | 1.49 | 0.58  | 0.5624   |
| 22  | rs2012907  | 39365250 | G  | 1.09 | 0.81 | 1.48 | 0.58  | 0.5650   |
| 22  | rs5750806  | 39371006 | A  | 0.99 | 0.71 | 1.38 | -0.06 | 0.9547   |
| 22  | rs1569499  | 39373813 | T  | 0.94 | 0.66 | 1.33 | -0.37 | 0.7146   |
| 22  | rs5995729  | 39393081 | C  | 1.05 | 0.75 | 1.46 | 0.29  | 0.7690   |

Chr, Chromosome; A1, minor allele for odds ratio; OR, odds ratio; odds ratio; L95, lower bond of 95% confidence interval; U95, upper bond of 95% confidence interval; STAT, statistics

**Supplementary Table 4: Full results of the single marker based analyses in discovery stage using dominant model**

| Chr | SNP        | Position | A1 | OR   | L95  | U95  | STAT  | P-value |
|-----|------------|----------|----|------|------|------|-------|---------|
| 21  | rs2277800  | 42404027 | T  | 1.14 | 0.86 | 1.52 | 0.90  | 0.3657  |
| 21  | rs7282058  | 42405366 | T  | 0.98 | 0.76 | 1.25 | -0.20 | 0.8432  |
| 21  | rs3746923  | 42406235 | T  | 0.90 | 0.69 | 1.16 | -0.84 | 0.4031  |
| 21  | rs3746925  | 42406509 | T  | 1.04 | 0.81 | 1.34 | 0.31  | 0.7575  |
| 21  | rs11700858 | 42415746 | C  | 0.97 | 0.69 | 1.36 | -0.19 | 0.8524  |
| 21  | rs11203203 | 42416077 | A  | 0.93 | 0.66 | 1.31 | -0.42 | 0.6761  |
| 21  | rs9976767  | 42416281 | G  | 1.09 | 0.85 | 1.40 | 0.67  | 0.5053  |
| 21  | rs13048049 | 42418534 | A  | 0.96 | 0.67 | 1.38 | -0.21 | 0.8373  |
| 21  | rs2839509  | 42426620 | G  | 1.05 | 0.79 | 1.38 | 0.32  | 0.7467  |
| 21  | rs12482947 | 42431928 | T  | 0.93 | 0.71 | 1.21 | -0.55 | 0.5822  |
| 21  | rs13052676 | 42432123 | T  | 1.03 | 0.80 | 1.32 | 0.21  | 0.8300  |
| 21  | rs1893592  | 42434957 | C  | 0.61 | 0.47 | 0.79 | -3.79 | 0.0001  |
| 21  | rs4101     | 42435358 | C  | 1.08 | 0.84 | 1.39 | 0.57  | 0.5677  |
| 21  | rs1893593  | 42438382 | A  | 0.96 | 0.75 | 1.23 | -0.34 | 0.7339  |
| 21  | rs2254368  | 42442356 | G  | 1.06 | 0.81 | 1.39 | 0.43  | 0.6679  |
| 21  | rs884339   | 42446395 | A  | 1.07 | 0.83 | 1.38 | 0.53  | 0.5951  |
| 21  | rs3827232  | 42446949 | T  | 0.97 | 0.75 | 1.26 | -0.23 | 0.8206  |
| 21  | rs2839519  | 42447734 | A  | 1.15 | 0.87 | 1.52 | 0.97  | 0.3312  |
| 22  | rs137682   | 39342420 | A  | 0.91 | 0.67 | 1.24 | -0.59 | 0.5547  |
| 22  | rs137684   | 39342720 | C  | 1.06 | 0.78 | 1.44 | 0.36  | 0.7162  |
| 22  | rs137685   | 39343623 | T  | 0.97 | 0.70 | 1.34 | -0.18 | 0.8589  |
| 22  | rs12166817 | 39350419 | A  | 1.06 | 0.78 | 1.45 | 0.38  | 0.7040  |
| 22  | rs909685   | 39351666 | T  | 0.70 | 0.54 | 0.90 | -2.76 | 0.0057  |
| 22  | rs2069235  | 39351775 | G  | 0.94 | 0.73 | 1.21 | -0.49 | 0.6211  |
| 22  | rs2049986  | 39360849 | G  | 1.07 | 0.82 | 1.38 | 0.48  | 0.6304  |
| 22  | rs739363   | 39364878 | C  | 1.08 | 0.77 | 1.52 | 0.47  | 0.6395  |
| 22  | rs2012907  | 39365250 | G  | 1.09 | 0.78 | 1.52 | 0.51  | 0.6082  |
| 22  | rs5750806  | 39371006 | A  | 0.97 | 0.68 | 1.40 | -0.15 | 0.8806  |
| 22  | rs1569499  | 39373813 | T  | 0.93 | 0.64 | 1.35 | -0.38 | 0.7007  |
| 22  | rs5995729  | 39393081 | C  | 1.05 | 0.74 | 1.49 | 0.27  | 0.7865  |

Chr, Chromosome; A1, minor allele for odds ratio; OR, odds ratio; L95, lower bond of 95% confidence interval; U95, upper bond of 95% confidence interval; STAT, statistics.

**Supplementary Table 5: Full results of the single marker based analyses in discovery stage using recessive model**

| Chr | SNP        | Position | A1 | OR   | L95  | U95  | STAT  | P-value |
|-----|------------|----------|----|------|------|------|-------|---------|
| 21  | rs2277800  | 42404027 | T  | 1.19 | 0.46 | 3.09 | 0.36  | 0.7224  |
| 21  | rs7282058  | 42405366 | T  | 0.99 | 0.65 | 1.51 | -0.05 | 0.9618  |
| 21  | rs3746923  | 42406235 | T  | 0.96 | 0.69 | 1.35 | -0.22 | 0.8235  |
| 21  | rs3746925  | 42406509 | T  | 1.10 | 0.65 | 1.86 | 0.34  | 0.7373  |
| 21  | rs11700858 | 42415746 | C  | 1.10 | 0.29 | 4.21 | 0.14  | 0.8864  |
| 21  | rs11203203 | 42416077 | A  | 1.10 | 0.29 | 4.16 | 0.13  | 0.8944  |
| 21  | rs9976767  | 42416281 | G  | 1.15 | 0.73 | 1.81 | 0.60  | 0.5489  |
| 21  | rs13048049 | 42418534 | A  | 1.30 | 0.33 | 5.06 | 0.37  | 0.7103  |
| 21  | rs2839509  | 42426620 | G  | 1.16 | 0.53 | 2.53 | 0.37  | 0.7124  |
| 21  | rs12482947 | 42431928 | T  | 0.96 | 0.70 | 1.31 | -0.25 | 0.8005  |
| 21  | rs13052676 | 42432123 | T  | 1.14 | 0.71 | 1.84 | 0.53  | 0.5942  |
| 21  | rs1893592  | 42434957 | C  | 0.44 | 0.25 | 0.79 | -2.75 | 0.0059  |
| 21  | rs4101     | 42435358 | C  | 1.04 | 0.59 | 1.84 | 0.15  | 0.8833  |
| 21  | rs1893593  | 42438382 | A  | 0.96 | 0.62 | 1.46 | -0.21 | 0.8368  |
| 21  | rs2254368  | 42442356 | G  | 1.02 | 0.74 | 1.40 | 0.11  | 0.9130  |
| 21  | rs884339   | 42446395 | A  | 1.06 | 0.73 | 1.54 | 0.29  | 0.7719  |
| 21  | rs3827232  | 42446949 | T  | 0.88 | 0.44 | 1.75 | -0.37 | 0.7120  |
| 21  | rs2839519  | 42447734 | A  | 1.34 | 0.58 | 3.12 | 0.68  | 0.4979  |
| 22  | rs137682   | 39342420 | A  | 0.90 | 0.29 | 2.79 | -0.18 | 0.8600  |
| 22  | rs137684   | 39342720 | C  | 0.81 | 0.22 | 2.91 | -0.33 | 0.7435  |
| 22  | rs137685   | 39343623 | T  | 0.58 | 0.13 | 2.67 | -0.70 | 0.4866  |
| 22  | rs12166817 | 39350419 | A  | 1.17 | 0.36 | 3.75 | 0.26  | 0.7942  |
| 22  | rs909685   | 39351666 | T  | 0.33 | 0.16 | 0.70 | -2.91 | 0.0036  |
| 22  | rs2069235  | 39351775 | G  | 0.96 | 0.61 | 1.53 | -0.16 | 0.8744  |
| 22  | rs2049986  | 39360849 | G  | 1.11 | 0.60 | 2.03 | 0.33  | 0.7445  |
| 22  | rs739363   | 39364878 | C  | 1.46 | 0.44 | 4.90 | 0.62  | 0.5369  |
| 22  | rs2012907  | 39365250 | G  | 1.30 | 0.40 | 4.25 | 0.43  | 0.6657  |
| 22  | rs5750806  | 39371006 | A  | 1.28 | 0.33 | 4.96 | 0.35  | 0.7256  |
| 22  | rs1569499  | 39373813 | T  | 0.97 | 0.20 | 4.86 | -0.03 | 0.9742  |
| 22  | rs5995729  | 39393081 | C  | 1.17 | 0.23 | 6.09 | 0.19  | 0.8492  |

Chr, Chromosome; A1, minor allele for odds ratio; OR, odds ratio; L95, lower bond of 95% confidence interval; U95, upper bond of 95% confidence interval; STAT, statistics.

**Supplementary Table 6: Full results of the single marker based analyses in validation stage using additive model**

| Chr | SNP       | Position | A1 | OR   | L95  | U95  | STAT  | P-value  |
|-----|-----------|----------|----|------|------|------|-------|----------|
| 21  | rs1893592 | 42434957 | C  | 0.70 | 0.60 | 0.83 | -4.22 | 2.49E-05 |
| 22  | rs909685  | 39351666 | T  | 0.72 | 0.61 | 0.85 | -3.78 | 1.55E-04 |

Chr, Chromosome; A1, minor allele for odds ratio; OR, odds ratio; odds ratio; L95, lower bond of 95% confidence interval; U95, upper bond of 95% confidence interval; STAT, statistics.

**Supplementary Table 7: Full results of the single marker based analyses in validation stage using dominant model**

| Chr | SNP       | Position | A1 | OR   | L95  | U95  | STAT  | P-value |
|-----|-----------|----------|----|------|------|------|-------|---------|
| 21  | rs1893592 | 42434957 | C  | 0.68 | 0.56 | 0.83 | -3.82 | 0.0001  |
| 22  | rs909685  | 39351666 | T  | 0.69 | 0.56 | 0.84 | -3.64 | 0.0003  |

Chr, Chromosome; A1, minor allele for odds ratio; OR, odds ratio; odds ratio; L95, lower bond of 95% confidence interval; U95, upper bond of 95% confidence interval; STAT, statistics.

**Supplementary Table 8: Full results of the single marker based analyses in validation stage using recessive model.**

| Chr | SNP       | Position | A1 | OR   | L95  | U95  | STAT  | P-value |
|-----|-----------|----------|----|------|------|------|-------|---------|
| 21  | rs1893592 | 42434957 | C  | 0.53 | 0.34 | 0.82 | -2.84 | 0.0046  |
| 22  | rs909685  | 39351666 | T  | 0.60 | 0.38 | 0.97 | -2.09 | 0.0366  |

Chr, Chromosome; A1, minor allele for odds ratio; OR, odds ratio; odds ratio; L95, lower bond of 95% confidence interval; U95, upper bond of 95% confidence interval; STAT, statistics.

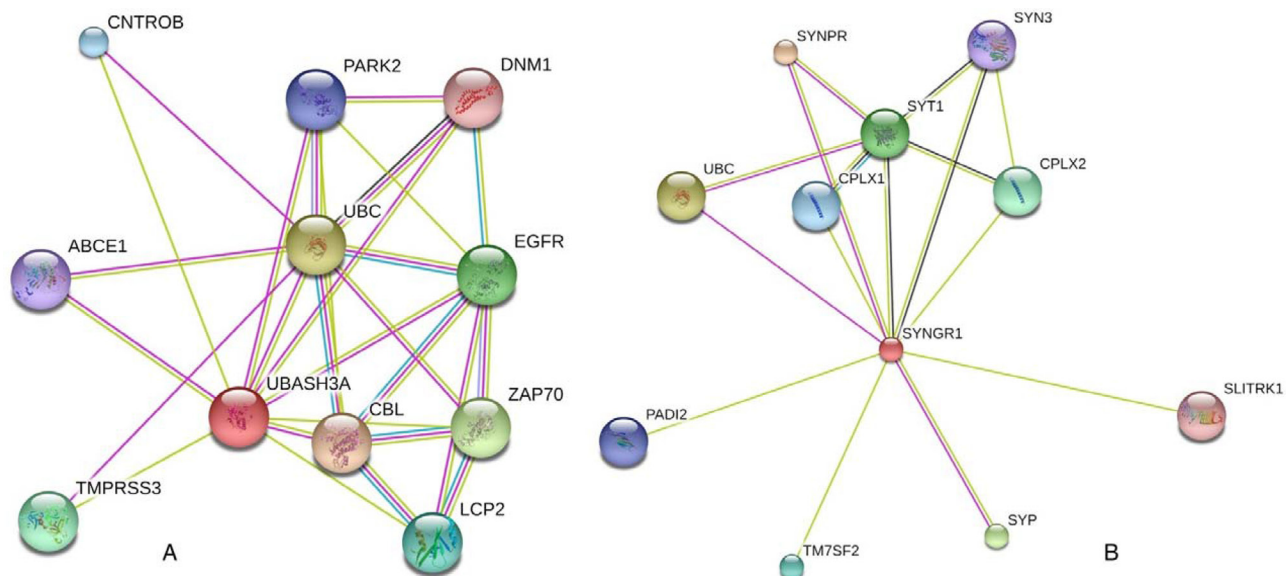

**Supplementary Figure 1:** (A) Protein-protein interaction plot for gene *UBASH3A*. (B) Protein-protein interaction plot for gene *SYNGR1*.

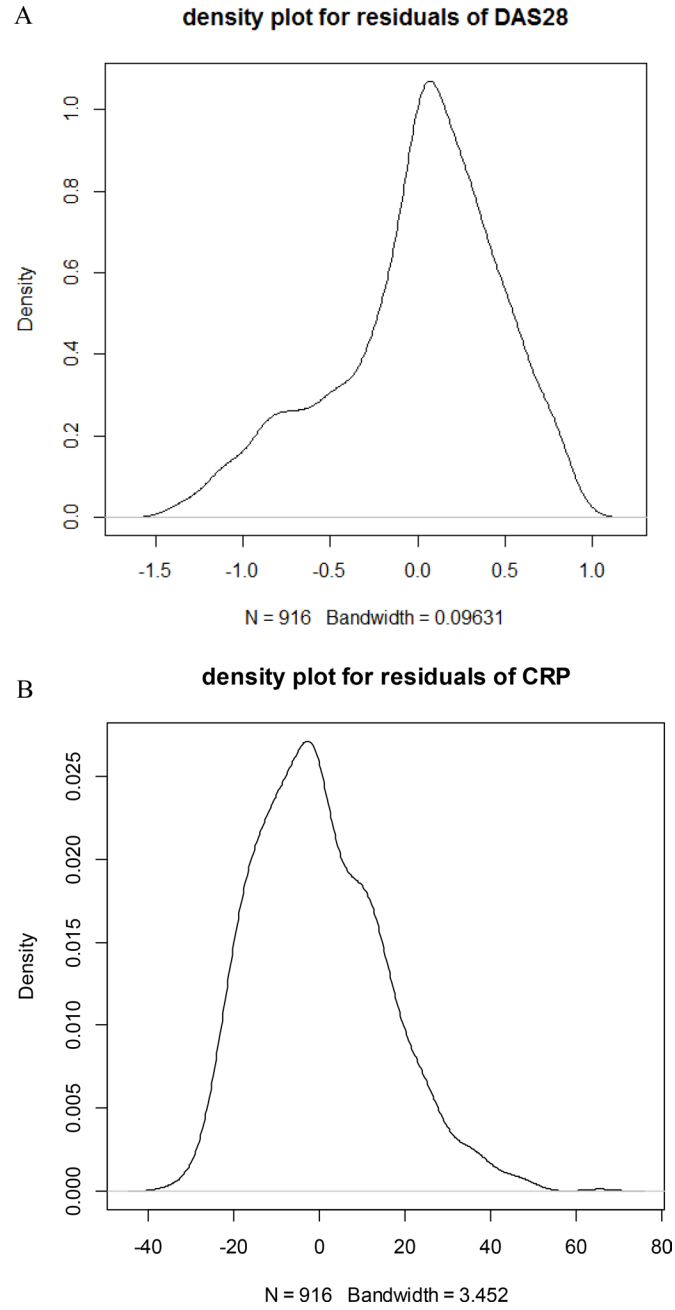

**Supplementary Figure 2:** (A) Density plot for residuals of DAS28 for rs1893592. (B) Density plot for residuals of CRP for rs1893592.
